# Supplementary material
Source: publisher site journal article supplement (https://www.dovepress.com/article/463974)
Supplement: Supplementary file 1 [file get_supplementary_file.php]

# Supplementary Material

# *Procedures*

# Scale translation

Through personal communication, permission for translation was obtained from Dr. P. Castagna and his co-authors. According to Brislin's translation procedure for cross-cultural research, the first step was forward translation.1 Two bilinguals in our research group translated the original scale, forming a forward translation version 1 and a forward translation version 2. In the second step, forward proofreading was carried out. Two bilinguals proficient in English and the above two translators compared and integrated the two forward translation versions. To ensure conceptual, content, and semantic equivalence, the author of this study actively communicated with Dr. P. Castagna to reduce the translation differences in different cultural backgrounds. According to the feedback of the original author, the forward translation version was modified, and the first Chinese version was finally formed. The third step was back translation, and the back translator should never have contact with the original scale. A bilingual with overseas study experience and a non-clinical Chinese who has lived in the United States for a long time translated the first Chinese version into English to form a back translation version 1 and a back translation version 2. The fourth step was back translation proofreading. Another bilingual and the above two translators integrated the two back translation versions to form the first version of the back translation. The original author reviewed the back translation version and put forward suggestions for revision, and the final version of the back translation was formed. Then, according to the final version of the back translation, the first Chinese version was modified, and the final Chinese version of CABS was formed.

# Cross-cultural adaptation of the scale

The cross-cultural adaptation of the scale included an expert committee and pilot test, which aimed to make the Chinese scale more consistent with the language habits of the current study population and ensured that the subjects could accurately understand the items.2 The first step was to form a committee of experts. This study had six experts, including psychiatrists, methodologists, and psychologists. Through letter consultation, the above experts were invited to make a cultural adjustment to the final Chinese version according to the content of the original scale and put forward modification opinions and suggestions. According to the experts' feedback, the final Chinese version was revised and finalized. At the same time, the final back translation version was translated, and the modification process and final results were fed back to the original author for approval.3 The second step was a pilot test. A total of 40 adult ADHD patients were included in the test to fill in the latest Chinese version of the scale. Subjects were asked to read the scale carefully and evaluate whether it was clearly described. If the unclear rate of an item was up to 20%, the item should be revised.4

|  | Male  (n = 101) | Female  (n = 112) | F | *p* |
| --- | --- | --- | --- | --- |
| Present-oriented use | 11.32 (5.82) | 10.48 (5.21) | 1.079 | 0.300 |
| Future-oriented use | 10.81 (6.81) | 10.59 (6.06) | 0.001 | 0.981 |
| Present-oriented effectiveness | 13.91 (6.64) | 12.97 (6.31) | 0.734 | 0.393 |
| Future-oriented effectiveness | 12.79 (6.60) | 12.38 (6.67) | 0.031 | 0.860 |

**Table S1** CABS scores in ADHD group of different genders

**Notes:**

**Abbreviations:** CABS, Compensatory ADHD Behaviors Scale; ADHD, attention-deficit/hyperactivity disorder; Controlling for age, years of education, ADHD subtype, comorbidities, and medication during the analysis.

**Table S2** CABS scores in ADHD group of different ADHD subtype

|  | ADHD-I  (n = 117) | ADHD-C  (n = 96) | F | *p* |
| --- | --- | --- | --- | --- |
| Present-oriented use | 10.47 (5.49) | 11.37 (5.52) | 1.387 | 0.240 |
| Future-oriented use | 10.07 (6.30) | 11.46 (6.50) | 2.680 | 0.103 |
| Present-oriented effectiveness | 13.53 (6.66) | 13.28 (6.26) | 0.135 | 0.713 |
| Future-oriented effectiveness | 12.41 (6.87) | 12.77 (6.34) | 0.122 | 0.727 |

**Notes:**

**Abbreviations:** CABS, Compensatory ADHD Behaviors Scale; ADHD, attention-deficit/hyperactivity; ADHD-I, inattentive type of ADHD; ADHD-C, combined type of ADHD; Controlling for age, years of education, gender, comorbidities, and medication status during the analysis.

**Table S3** CABS scores in ADHD group with and without comorbidities

|  | Without comorbidities  (n = 73) | With comorbidities  (n = 140) | F | *p* |
| --- | --- | --- | --- | --- |
| Present-oriented use | 11.81 (5.40) | 10.39 (5.53) | 2.724 | 0.100 |
| Future-oriented use | 11.63 (6.14) | 10.21 (6.52) | 2.252 | 0.135 |
| Present-oriented effectiveness | 14.38 (6.67) | 12.91 (6.33) | 1.783 | 0.183 |
| Future-oriented effectiveness | 13.07 (6.00) | 12.31 (6.93) | 0.341 | 0.560 |

**Notes:**

**Abbreviations:** CABS, Compensatory ADHD Behaviors Scale; ADHD, attention-deficit/hyperactivity; Controlling for age, years of education, gender, ADHD subtype, and medication status during the analysis.

**Table S4** CABS scores in ADHD group with and without medication

|  | Without medication  (N = 120) | With medication  (N = 93) | F | *p* |
| --- | --- | --- | --- | --- |
| Present-oriented use | 10.87 (5.63) | 10.89 (5.38) | 0.043 | 0.836 |
| Future-oriented use | 9.93 (5.89) | 11.68 (6.94) | 3.391 | 0.067 |
| Present-oriented effectiveness | 12.86 (6.24) | 14.14 (6.72) | 1.632 | 0.203 |
| Future-oriented effectiveness | 11.56 (6.65) | 13.88 (6.38) | 6.106 | 0.014* |

**Notes:**

**Abbreviations:** CABS, Compensatory ADHD Behaviors Scale; ADHD, attention-deficit/hyperactivity disorder; Controlling for age, years of education, gender, ADHD subtype, and comorbidity during the analysis; *: *p* < 0.05.

**Table S5** Factor loadings of the EFA with the CABS (n=153)

| Item Number | Factor | | | |
| --- | --- | --- | --- | --- |
| Factor 1 | Factor 2 | Factor 3 | Factor 4 |
| 1 | -0.012 | 0.604 | 0.037 | 0.089 |
| 2 | 0.127 | 0.545 | 0.141 | -0.021 |
| 3 | 0.058 | 0.814 | 0.072 | -0.194 |
| 4 | 0.057 | 0.899 | -0.080 | -0.162 |
| 5 | 0.892 | 0.022 | 0.097 | -0.385 |
| 6 | 0.939 | 0.102 | -0.097 | -0.240 |
| 7 | 0.949 | 0.047 | -0.227 | -0.135 |
| 8 | 0.820 | 0.178 | -0.221 | 0.095 |
| 9 | -0.082 | 0.049 | -0.333 | 0.809 |
| 10 | 0.098 | 0.576 | 0.034 | 0.092 |
| 11 | 0.553 | 0.095 | -0.349 | 0.379 |
| 12 | 0.489 | 0.108 | 0.074 | 0.046 |
| 13 | 0.096 | 0.029 | 0.736 | -0.158 |
| 14 | -0.083 | 0.405 | 0.546 | -0.142 |
| 1b | 0.064 | 0.338 | 0.209 | 0.261 |
| 2b | 0.033 | 0.519 | 0.085 | 0.245 |
| 3b | -0.074 | 0.804 | -0.048 | 0.102 |
| 4b | -0.063 | 0.764 | 0.115 | 0.017 |
| 5b | 0.677 | -0.220 | 0.454 | -0.136 |
| 6b | 0.680 | -0.154 | 0.281 | 0.066 |
| 7b | 0.672 | -0.144 | 0.108 | 0.270 |
| 8b | 0.531 | -0.051 | 0.144 | 0.447 |
| 9b | -0.263 | -0.086 | 0.095 | 0.853 |
| 10b | -0.048 | 0.213 | 0.487 | 0.278 |
| 11b | 0.187 | 0.119 | 0.092 | 0.567 |
| 12b | 0.178 | -0.061 | 0.544 | 0.319 |
| 13b | -0.049 | 0.005 | 0.860 | -0.075 |
| 14b | -0.201 | 0.153 | 0.833 | -0.097 |

**Notes:**

**Abbreviations:** EFA, Exploratory factor analysis; CABS, Compensatory ADHD Behaviors Scale.

**Table S6** Results of criterion validity in the non-medication ADHD subgroup (n=120)

|  | Present-oriented use | Future-oriented use | Present-oriented  effectiveness | Future-oriented  effectiveness |
| --- | --- | --- | --- | --- |
| ADHD-RS  inattention score | -0.21 | -0.18 | -0.07 | -0.05 |
| ADHD-RS hyperactivity/ impulse score | -0.11 | -0.12 | -0.03 | -0.11 |
| ADHD-RS  total score | -0.23 | -0.22 | -0.08 | -0.11 |
| BRIEF-A PO | -0.42*** | -0.25* | -0.27* | -0.18 |
| BRIEF-A OM | -0.46*** | -0.27* | -0.33*** | -0.16 |
| Mazes | -0.01 | -0.12 | -0.11 | -0.13 |

**Notes:**

**Abbreviation:** ADHD, attention-deficit/hyperactivity disorder; ADHD-RS, ADHD Rating Scale; BRIEF-A, Behavior Rating Inventory of Executive Function-Adult Version; PO, Plan/Organize; OM, Organization of Materials; Mazes, Neuropsychological Assessment Battery: Mazes; * *p*adj < .05; *** *p*adj < .001; Controlling for gender, age, years of education, comorbidity, and ADHD subtype during the analysis.

**Table S7** Results of criterion validity in the medication ADHD subgroup (n=93)

|  | Present-oriented use | Future-oriented use | Present-oriented  effectiveness | Future-oriented  effectiveness |
| --- | --- | --- | --- | --- |
| ADHD-RS  inattention score | -0.35** | -0.27* | -0.17 | -0.28* |
| ADHD-RS hyperactivity/ impulse score | 0.07 | 0.14 | 0.04 | -0.03 |
| ADHD-RS  total score | -0.18 | -0.09 | -0.09 | -0.19 |
| BRIEF-A PO | -0.34** | -0.24 | -0.15 | -0.21 |
| BRIEF-A OM | -0.54*** | -0.34** | -0.34** | -0.28* |
| Mazes | 0.10 | 0.35** | 0.00 | 0.06 |

**Notes:**

**Abbreviation:** ADHD, attention-deficit/hyperactivity disorder; ADHD-RS, ADHD Rating Scale; BRIEF-A, Behavior Rating Inventory of Executive Function-Adult Version; PO, Plan/Organize; OM, Organization of Materials; Mazes, Neuropsychological Assessment Battery: Mazes; * *p*adj < .05; ** *p*adj < .01; *** *p*adj < .001; Controlling for gender, age, years of education, comorbidity, and ADHD subtype during the analysis.

# Reference

1. Brislin RW. Back-Translation for Cross-Cultural Research. *Journal of Cross-Cultural*

*Psychology.* 2016;1(3):185-216.

2. Beaton DE, Bombardier C, Guillemin F, Ferraz MB. Guidelines for the process of cross-cultural adaptation of self-report measures. *Spine (Phila Pa 1976).* 2000;25(24):3186-3191.

3. Sousa VD, Rojjanasrirat W. Translation, adaptation and validation of instruments or

scales for use in cross-cultural health care research: a clear and user-friendly

guideline. *J Eval Clin Pract.* 2011;17(2):268-274.

4. Topf M. Three estimates of interrater reliability for nominal data. *Nurs Res.*

1986;35(4):253-255.
